# Supplementary material for: Neuropathic Injury–Induced Plasticity of GABAergic System in Peripheral Sensory Ganglia
Source: Front Pharmacol. 2021 Jul 27;12:702218. doi: 10.3389/fphar.2021.702218 (PMC8354334; doi:10.3389/fphar.2021.702218)
Supplement: Supplementary file 2 [file DataSheet4.xlsx]

## Sheet: Fig5A
	Fig5A original data
	X	mRNA expression of α5-GABAA（Y）		Fig5A statistical data
	α5-shRNA	0.5265			mRNA expression level
	α5-shRNA	0.42197		X	Mean（Y）	Mean±SE	P	one-way ANOVA
	α5-shRNA	0.42824		Scramble	1	0
	α5-shRNA	0.55948		α5-shRNA	0.53455	0.05721	3.86863e-05
	α5-shRNA	0.73654
	Scramble	1
	Scramble	1
	Scramble	1
	Scramble	1
	Scramble	1

## Sheet: Fig5B
Fig5B original data
X	mechanical threshold （g）																																					Fig5B statistical data
baseline	6	8	15	8	15	6	6	8	8	6	15	10	10	6	10	2	6	15	2	8	6	6	6	8	4	6	15	10	10	4	15	8	10	15	15				mechanical threshold		one-way ANOVA
Scramble	8	6	6	6	8	8	15	8	6	10	2	6	15	8	4	10																						X	Mean（Y）	Mean±SE	p
alpha5-shRNA	10	6	15	8	10	8	15	15	15	8	6	10	15	6	8	15																						baseline	8.8	0.67
																																						Scramble	7.875	0.8606	0.03807
																																						alpha5-shRNA	10.625	0.93039	0.17793

## Sheet: Fig5C
	Fig5C original data
	X	thermal threshold （s）
	baseline	14.7333	20.9	22.1	12.05	16.3	20.75	18.55	17.9	30	23.2	18.9667	16.1667	14.95	18.6	20.25	14.9	16.3	22.4	19.5	19	16.7333	16.3667	22.7	18.7	17.5	16.45	19.6	21.05	19.25	21.4	23.5	23.7	23.3	26.65	16.9
	Scramble	20.65	22	21.75	19.45	24.1	20.85	30	30	16.3333	24.05	19.85	17.35	16.5333	17.4	19.35	30
	alpha5-shRNA	30	25.8333	24.7333	15.1333	16.5	19.45	20.05	24.95	24.8667	25.25	23.0333	23.8	22.5667	18.4	15.5333	17.9
		Fig5C statistical data
			thermal threshold
		X	Mean（Y）	Mean±SE	p
		baseline	19.4662	0.61722
		Scramble	21.8542	1.1662	0.055
		alpha5-shRNA	21.75	1.07349	0.94804

## Sheet: Fig5D
	Fig5D original data											Fig5D statistical data
												X	mechanical threshold（g）				p
	Time（X）		mechanical threshold g（Y）										Scramble		AAV2/5-α5shRNA-GFP
	‘-1st	Sramble	8	6	6	6	8	8					Mean（Y1）	Mean±SE	Mean(Y2)	Mean±SE
		AAV2/5-α5shRNA-GFP	10	15	8	10	8	15	15			‘-1st	7	0.44721	11.5714	1.25085	0.00819
	1st	Sramble	2	10	2	6	4	10				1st	5.66667	1.49815	8.42857	1.44514	0.21291
		AAV2/5-α5shRNA-GFP	10	10	8	8	4	4	15			3th	4.33333	0.33333	5.42857	0.57143	0.14211
	3th	Sramble	4	4	4	4	6	4				5th	4	1.0328	5.14286	1.05624	0.4591
		AAV2/5-α5shRNA-GFP	4	4	6	4	6	6	8			7th	3.33333	0.66667	4.85714	0.96186	0.23464
	5th	Sramble	2	2	8	6	2	4				10th	4.33333	0.95452	5.42857	0.71903	0.3712
		AAV2/5-α5shRNA-GFP	2	8	4	2	8	4	8			14th	3.66667	0.33333	5.14286	0.73771	0.11
	7th	Sramble	2	4	6	4	2	2
		AAV2/5-α5shRNA-GFP	2	8	4	2	6	4	8
	10th	Sramble	2	6	2	8	4	4
		AAV2/5-α5shRNA-GFP	6	8	2	6	4	6	6
	14th	Sramble	2	4	4	4	4	4
		AAV2/5-α5shRNA-GFP	8	6	4	4	6	2	6

## Sheet: Fig5E
	F
		Fig5E original data
													Fig5Estatistical data
		Time（X）		thermal threshold s（Y）									X	thermal threshold（s）				p
		‘-1st	Sramble	20.65	22	21.75	19.45	24.1	20.85					Scramble		AAV2/5-α5shRNA-GFP
			AAV2/5-α5shRNA-GFP	30	24.7333	15.1333	16.5	19.45	20.05	24.95				Mean（Y1）	Mean±SE	Mean(Y2)	Mean±SE
		1st	Sramble	23.7	18.6667	16.9	15.3667	28	24.9333				‘-1st	21.4667	0.64326	21.5452	1.99065	0.97269
			AAV2/5-α5shRNA-GFP	24.8667	23.2667	21.45	20.1	18.5333	15	24.8			1st	21.2611	2.04402	21.1452	1.3582	0.96218
		3th	Sramble	18.475	16.3333	16.1333	20.1	16.9333	11.4				3th	16.5625	1.19996	18.5	1.33712	0.311
			AAV2/5-α5shRNA-GFP	19.7667	18.1667	16.2667	20.1667	21.6333	21.7333	11.7667			5th	15.4333	0.5146	19.2619	1.16343	0.01621
		5th	Sramble	16.6333	13.8	14.2	16.5667	15.0333	16.3667				7th	16.5111	2.28289	18.1095	1.99057	0.60638
			AAV2/5-α5shRNA-GFP	23.2667	15.7333	16.3667	21.7333	21.8667	16.6	19.2667			10th	14.9222	1.30701	19.3191	1.67509	0.06893
		7th	Sramble	14.1	25.6333	20.5333	10.8333	12.2333	15.7333				14th	14.7319	0.81086	18.4595	0.93062	0.01282
			AAV2/5-α5shRNA-GFP	12.3333	11.1	20.8333	21.2667	22.7667	14.6333	23.8333
		10th	Sramble	21.2667	13.2667	12.3333	14.2667	14.4	14				group	F1,11=7.085	p=0.022
			AAV2/5-α5shRNA-GFP	17.2333	17.2667	14.5667	27.1	19.9	16	23.1667
		14th	Sramble	18.15	15.6	13.6667	13.475	12.6	14.9
			AAV2/5-α5shRNA-GFP	16.6667	17.7667	15.2	17.5	22.7	19.45	19.9333
