# Supplementary material for: Neuropathic Injury–Induced Plasticity of GABAergic System in Peripheral Sensory Ganglia
Source: Front Pharmacol. 2021 Jul 27;12:702218. doi: 10.3389/fphar.2021.702218 (PMC8354334; doi:10.3389/fphar.2021.702218)
Supplement: Supplementary file 4 [file DataSheet5.xlsx]

## Sheet: Fig6A
	Fig6A original data
	Time（X）		mechanical threshold g（Y）
	‘-1st	Normal saline	10	15	15	15	15	15	15			Fig6A statistical data
		L655708	15	15	15	15	15	15	15			Time（X）	mechanical threshold（g）
	1st	Normal saline	10	15	8	10	15	15	15				Normal Saline		L655708		one-way ANOVA
		L655708	15	15	15	15	15	15	8				Mean(Y1)	±SE	Mean（Y2）	±SE	p	Test of Between-Subjects Effects
	3rd	Normal saline	10	15	2	10	8	15				-1st	14.2857	0.71429	15	0	0.33705
		L655708	15	15	15	15	4	15				1st	12.5714	1.17224	14	1	0.37212
	5th	Normal saline	15	15	10	6	4	10	10			3th	10	1.98326	13.1667	1.83333	0.26818
		L655708	20	15	6	4	10	15	10			5th	10	1.55839	11.4286	2.11409	0.59645
	7th	Normal saline	8	4	15	10	2	4	4			7th	6.71429	1.72812	12.2857	1.37519	0.02678
		L655708	10	10	15	15	15	15	6			10th	6	1.54919	12.6667	1.56347	0.0127
	10th	Normal saline	4	10	10	2	8	2	--			14th	5.33333	1.22927	11.6667	2.24598	0.0329	F 1 10 =17.651 p=0.02
		L655708	15	15	15	10	15	6
	14th	Normal saline	8	4	8	2	2	8
		L655708	15	15	8	15	2	15

## Sheet: Fig6B
Fig6B original data
									Fig6B statistical data
Time（X）		thermal threshold g（Y）							Time（X）	thermal threshold（s）
‘-1st	Normal saline	28.6	24.25	23.8667	22.7333	28.5667	30			Normal Saline		L655708
	L655708	27.3	23.6667	25.95	28.7667	30	23.3333			Mean(Y1)	±SE	Mean（Y2）	±SE	p
1st	Normal saline	27.4	26.8333	27.05	21.6	24.125	24.7		-1st	26.3361	1.25106	26.5028	1.1013	0.92
	L655708	23.2	22.8	30	24.05	24.8	29.6		1st	25.2847	0.91748	25.7417	1.31507	0.78148
3rd	Normal saline	21.4667	21.4	26.7333	23.55	26	20.5		3th	23.275	1.06376	26.3972	1.32447	0.09592
	L655708	28.4	29.0333	21.8	30	25.25	23.9		5th	21.9028	0.90415	24.3514	1.94872	0.28093
5th	Normal saline	19.8333	20.7	22.2333	26.1	20.9	21.65		7th	19.0514	0.82315	23.4444	1.67157	0.04011
	L655708	30	25	20.1333	17.475	25.1667	28.3333		10th	19.8875	1.21634	23.7028	0.76389	0.02405
7th	Normal saline	17.5	17.925	16.775	19.475	20.6	22.0333		14th	20.6181	2.55719	23.6903	1.32621	0.31127
	L655708	27.825	18.3333	20.4667	27.475	25.8667	20.7
10th	Normal saline	20.9	24	21.1	19.025	19.3	15
	L655708	25.65	23.9	23.825	23.6333	20.2333	24.975
14th	Normal saline	30	25.1	18.2667	21.8333	14.4333	14.075
	L655708	25.3667	19.2	24.6	28.4333	23.375	21.1667
