# Supplementary material for: Neuropathic Injury–Induced Plasticity of GABAergic System in Peripheral Sensory Ganglia
Source: Front Pharmacol. 2021 Jul 27;12:702218. doi: 10.3389/fphar.2021.702218 (PMC8354334; doi:10.3389/fphar.2021.702218)
Supplement: Supplementary file 5 [file DataSheet1.xlsx]

## Sheet: Fig2A1
		Number of neurons（Y）
	diameter（μm）	α1-positive	all neurons
	<15	1	1
	15-20	10	23
	20-25	64	81
	25-30	56	72
	30-35	21	34
	35-40	10	21
	40-45	4	5
	>45	3	3
	sum	169	240

## Sheet: Fig2A2
FigA2 statistical data				FigA2 original data
	Cell proportion（%）				cell number of α1+ and marker positive	cell number of α1+
	positive	negetive		CGRP	40	97
CGRP（+/-）/α1+	41.2371	58.7629		IB4	37	48
IB4（+/-）/α1+	77.0833	22.9167		NF200	31	47
NF200（+/-）/α1+	65.9574	34.0425

## Sheet: Fig2B1
		Number of neurons（Y）
	diameter（μm）	α4-positive	all neurons
	<15	1	4
	15-20	12	26
	20-25	47	71
	25-30	46	63
	30-35	15	24
	35-40	4	13
	40-45	4	8
	>45	1	3
	sum	130	212

## Sheet: Fig2B2
FigB2 statistical data				FigB2 original data
	Cell proportion（%）				cell number of α4+ and marker positive	cell number of α4+
	positive	negetive		CGRP	42	69
CGRP（+/-）/α4+	60.8696	39.1304		IB4	54	78
IB4（+/-）/α4+	69.2308	30.7692		NF200	27	65
NF200（+/-）/α4+	41.5385	58.4615

## Sheet: Fig2C1
		Number of neurons（Y）
	diameter（μm）	α5-positive	all neurons
	<15	1	4
	15-20	37	46
	20-25	103	131
	25-30	138	164
	30-35	101	122
	35-40	77	89
	40-45	38	57
	>45	9	14
	sum	504	627

## Sheet: Fig2C2
FigC2 statistical data				FigC2 original data
	Cell proportion（%）				cell number of α5+ and marker positive	cell number of α5+
	positive	negetive		CGRP	42	69
CGRP（+/-）/α5+	60.8696	39.1304		IB4	54	78
IB4（+/-）/α5+	69.2308	30.7692		NF200	27	65
NF200（+/-）/α5+	41.5385	58.4615

## Sheet: Fig2D1
		Number of neurons（Y）
	diameter（μm）	β2-positive	all neurons
	<15	0	0
	15-20	5	8
	20-25	55	77
	25-30	50	66
	30-35	18	24
	35-40	13	19
	40-45	5	9
	>45	1	8
	sum	147	211

## Sheet: Fig2D2
	FigD2 statistical data				FigD2 original data
		Cell proportion（%）				cell number of α5+ and marker positive	cell number of α5+
		positive	negetive		CGRP	42	69
	CGRP（+/-）/α5+	60.8696	39.1304		IB4	54	78
	IB4（+/-）/α5+	69.2308	30.7692		NF200	27	65
	NF200（+/-）/α5+	41.5385	58.4615

## Sheet: Fig2E1
	Number of neurons（Y）
diameter（μm）	B2-positive	all neurons
<15	0	0
15-20	15	33
20-25	39	78
25-30	39	63
30-35	21	36
35-40	4	5
40-45	2	4
>45	0	0
sum	120	219

## Sheet: Fig2E2
FigE2 statistical data				FigE2 original data
	Cell proportion（%）				cell number of B2+ and marker positive	cell number of B2+
	positive	negetive		CGRP	42	69
CGRP（+/-）/B2+	60.8696	39.1304		IB4	54	78
IB4（+/-）/B2+	69.2308	30.7692		NF200	27	65
NF200（+/-）/B2+	41.5385	58.4615

[truncated: 2 more sheets: Fig2F1, Sheet12]
