# Supplementary material for: Neuropathic Injury–Induced Plasticity of GABAergic System in Peripheral Sensory Ganglia
Source: Front Pharmacol. 2021 Jul 27;12:702218. doi: 10.3389/fphar.2021.702218 (PMC8354334; doi:10.3389/fphar.2021.702218)
Supplement: Supplementary file 6 [file DataSheet2.xlsx]

## Sheet: Fig3A1
	Fig3A original data
	Time（X）		mechanical threshold g（Y）								t-Test Statistics
	base	CCI	15	15	15	15	15	15	15	15
		sham	15	15	15	15	15	15	15	10
	1st	CCI	4	4	4	4	4	8	2	2
		sham	15	15	15	15	15	15	4	15	1.89019e-05
	5th	CCI	4	4	4	4	4	4	4	4
		sham	15	15	15	15	15	15	4	15	6.24795e-06
	10th	CCI	2	2	4	2	2	6	--	--
		sham	15	15	15	15	15		4	--	0.000403372
	14th	CCI	2	8	4	--	--	--	--	--
		sham	15	15	10	--	--	--	--	--	0.02335
		Fig 3A statisical data
			Mechanical threshold（g）
			Sham		CCI		one-way ANOVA
		Time（X）	Mean（Y1）	±SE	Mean（Y1）	±SE	p
		base	14.4444	0.55556	15	0
		1st	12.5556	1.61685	5.22222	1.35173	1.89019e-05
		5th	12.5556	1.61685	4.6	0.6	6.24795e-06
		10th	13.1667	1.83333	3	0.68313	0.000403372
		14th	13.3333	1.66667	4.66667	1.76383	0.02335

## Sheet: Fig3B
											t-Test Statistics
	Thermal threshold s （Y）										p
CCI	28.76	30	26.2	28.5	27.72	30	27.04	27.4	27.9	27.0333
sham	29.2	25.7667	25.75	26.1333	27.0667	28.6667	27.6333	30	27.0667	30	0.62494
CCI	22.7333	16.8333	15.9333	16.8333	20.9	17.8333	21.5667	14	12	11.8333
sham	27.8	27.4333	27.7667	26.6	30	26.9	26.8667	27.8333	25.45	--	5.56892e-07
CCI	16.3667	14.2	18.7033	14.5667	17.0333	13.7667	17.9	13.7667	17.4333	12.1333
sham	23.7	26.5667	27.1333	25.6	21.1667	30	28.4667	27.3667	29.4333	--	2.7161e-08
CCI	14.5	20.9333	14.8333	16.1	18	9.06667	--	--	--	--
sham	30	24.2	29.2	24.2	30	29.15	--	--	--	--	0.000107882
CCI	14.5	20.9333	14.8333	16.1	18	9.06667	--	--	--	--
sham	25.4333	27.4333	27.4	--	--	--	--	--	--	--	0.00238779
	Fig3B statistical data
		thermal threshold（s）
		Sham		CCI		one-way ANOVA
	Time（X）	Mean(Y1)	±SE	Mean（Y2）	±SE	p
	base	28.0553	1.26234	27.7283	1.65186	0.62494
	1th	27.4056	0.41197	17.0467	1.20875	5.56892e-07
	5th	26.6037	0.9345	15.587	0.68872	2.7161e-08
	10th	27.7917	1.14575	15.5722	1.62206	0.000107882
	14th	26.7556	0.66118	15.5722	1.62206	0.00238779

## Sheet: Fig3C
	Fig3 C original data
	X	relative mRNA expression of CCI-5th-day										Fig3C statistical data
	ATF3	5.09339	5.19067	3.63008	4.90754	6.7039	5.81589	8.69388	--			relative mRNA expression of CCI-5th-day
	alpha1	0.64262	0.88167	0.43077	0.36476	0.14968	1.33793	--	--			X	Mean（Y）	±SE	P	one-way ANOVA
	alpha2	1.79597	1.58966	1.56374	1.31951	--	1.36131	--	--			ATF3	5.71934	0.60792	1e-05
	alpha3	1.71251	1.10155	1.8025	1.04972	0.56058	1.17691	--	--			alpha1	0.63457	0.17371	0.03297
	alpha5	5.11806	3.55141	3.94493	4.37717	2.61625	4.06287	--	--			alpha2	1.52604	0.08606	4e-05
	bate1	3.06664	4.23229	1.38032	2.38667	1.28565	1.40688	--	--			alpha3	1.23396	0.18801	0.12086
	beta-2	1.86066	0.75444	2.0209	1.83401		0.90909	--	--			alpha5	3.94512	0.34143	0
	beta-3	1.53141	1.11709	1.85318	1.77769	1.2812	1.59937	--	--			bate1	2.29307	0.48308	0.01161
	gamma1	0.92421	1.55907	1.25701	1.84038	0.46895	--	--	--			beta-2	1.47582	0.266	0.07884
	gamma2	0.79834	0.61978	0.55864	0.44751	1.13879	1.01572	0.69255	--			beta-3	1.52665	0.11589	0.00053
	gamma3	0.74078	1.12994	1.16878	1.45902		1.17283	--	--			gamma1	1.20992	0.24003	0.35792
	B1	1.23075	0.65899	1.27899	1.51047	0.87661	1.31039	0.77916	--			gamma2	0.75305	0.09416	0.00724
	B2	1.31667	1.63968	0.25525	1.72907	0.83364	1.46155	0.78458	--			gamma3	1.13427	0.11467	0.09387
	GAD67	0.78083	0.74379	0.40754	--	0.20448	0.56644	--	--			B1	1.09219	0.12039	0.49582
	GAT-1	1.36399	1.01973	0.44751	1.13682	0.49056	1.24617	1.54756	--			B2	1.14578	0.20319	0.48682
	GAT-2	2.31682	1.13837	1.82134	1.72907	2.65737	1.28788	--	--			GAD67	0.54061	0.10732	0.00021
	GAT-3	0.89536	1.02323	2.06337	2.52275	1.83719	1.00173	--	--			GAT-1	1.03605	0.15944	0.83904
	nkcc1	1.66713	1.45695	0.91868	0.74277	3.49298	2.69733	1.72348	1.58933			GAT-2	1.82514	0.23832	0.00305
												GAT-3	1.55727	0.2768	0.07178
												NKCC1	1.78608	0.32043	0.02787

## Sheet: Fig3D
	Fig3 D original data													Fig3D statistical data
	X	relative mRNA expression of CCI-14th-day												relative mRNA expression of CCI-14th-day
	ATF3	4.37791	4.01881	2.96391	3.16565	7.91725	7.6211	3.41054	2.44528	1.56917	--			X	Mean（Y）	±SE	P	one-way ANOVA
	alpha1	0.97095	0.48583	0.67129	0.58642	0.86304	0.5481	0.64618	0.42928	0.8827	0.96594			ATF3	4.16551	0.73406	0.00027
	alpha2	0.59593	0.59439	0.69376	0.77512	0.96426	0.73841	--	--	--	--			alpha1	0.70497	0.06348	1e-05
	alpha3	0.72831	0.82087	0.82502	0.81649	1.19127	1.23756	--	--	--	--			alpha2	0.72698	0.05616	1e-05
	alpha5	0.92669	1.5214	0.56448	1.83401	4.92458	3.91768	--	--	--	--			alpha3	0.93659	0.08927	0.36331
	bate1	0.60886	1.90367	0.21953	1.28565	0.71203	1.23542	--	--	--	--			alpha5	2.28147	0.71238	0.03209
	beta-2	0.81293	0.88531	0.74872	0.64506	1.13485	0.87206	--	--	--	--			bate1	0.99419	0.24485	0.97541
	beta-3	1.24812	1.14401	1.12311	1.05519	1.31722	0.68658	--	--	--	--			beta-2	0.84982	0.06745	0.01065
	gamma1	0.6267	0.67025	0.69979	0.25349	1.42158	1.37316	--	--	--	--			beta-3	1.0957	0.09026	0.1825
	gamma2	1.17064	0.62788	0.65975	0.65975	0.84675	0.62851	0.5	0.47303	0.88884	0.6552			gamma1	0.84083	0.18801	0.28159
	gamma3	0.95402	0.92518	1.05885	0.42558	0.41323	0.62417	--	--	--	--			gamma2	0.71103	0.06537	0.00017
	B1	1.83106	1.52454	0.65747	0.56841	0.58237	0.8409	1.04247	0.79004	1.33793	1.02811			gamma3	0.7335	0.11555	0.04378
	B2	2.54934	1.5853	1.75321	1.07923	0.62093	0.65861	0.69737	0.49312	1.52626	1.41421			B1	1.02033	0.13441	0.88146
	GAD67	0.35784	0.4862	0.28175	0.37307	0.54055	0.5061	--	0.95926	1.28343	0.99309			B2	1.23776	0.20571	0.26289
	GAT-1	0.89874	1.08514	0.34568	0.89038	0.41754	1.02456	0.6552	0.47303	2.01391	0.64171			GAD67	0.74866	0.14862	0.00232
	GAT-2	0.56926	1.17998	0.47715	0.57535	0.40123	0.60605	--	--	--	--			GAT-1	0.84459	0.15308	0.32344
	GAT-3	0.79653	0.71508	1.54221	0.64171	1.13288	1.40932	--	--	--	--			GAT-2	0.63483	0.11333	0.00914
	nkcc1	1.44978	1.50214	0.62298	0.33481	0.99651	1.90214	0.87317	0.60077	1.59	--			GAT-3	1.03962	0.155	0.80341
														NKCC1	1.09692	0.17842	0.59446

## Sheet: Fig3E
	FigE orginal data
	X	relative expression of α5 protein		Fig3E statistical data
	5th Sham	1		relative expression of α5 protein
	5th Sham	1		X	Mean（Y）	±SE	P	one-way ANOVA
	5th Sham	1		sham	1	0
	5th CCI	1.2		5th CCI	1.46667	0.15592	0.04	--
	5th CCI	1.46
	5th CCI	1.74		sham	1	0
				14th CCI	1.67965	0.12878	0.0018
	14th Sham	1
	14th Sham	1
	14th Sham	1
	14th Sham	1
	14th CCI	1.59
	14th CCI	2
	14th CCI	1.3886
	14th CCI	1.74
